# Supplementary material for: Realizing the potential of hydrophobic crystalline carbon as a support for oxygen evolution electrocatalysts
Source: Royal Society of Chemistry journal article supplement (doi:10.1039/d3ee00987d), 2023-01-01
Supplement: d3ee00987d1.pdf [file d3ee00987d1.pdf]

*Electronic Supplementary Information (ESI)*

# Realizing the Potential of Hydrophobic Crystalline Carbon as a Support for Oxygen Evolution Electrocatalysts

*Myeong-Geun Kim,<sup>a,†</sup> Tae Kyung Lee,<sup>a,b,†</sup> Eungjun Lee,<sup>a,c,†</sup> Subin Park,<sup>a</sup> Hyun Ju Lee,<sup>d</sup> Haneul Jin,<sup>e</sup> Dong Wook Lee,<sup>a</sup> Min-Gi Jeong,<sup>f</sup> Hun-Gi Jung,<sup>f</sup> Kyungmin Im,<sup>a</sup> Chuan Hu,<sup>g</sup> Hyung Chul Ham,<sup>d</sup> Kwang Ho Song,<sup>b</sup> Yung-Eun Sung,<sup>c,h</sup> Young Moo Lee,<sup>g</sup> and Sung Jong Yoo<sup>\*a,i,j,‡</sup>*

<sup>a</sup>Center for Hydrogen-Fuel Cell Research, Korea Institute of Science and Technology (KIST), 5 Hwarang-ro 14-gil, Seongbuk-gu, Seoul 02792, Republic of Korea

<sup>b</sup>Department of Chemical and Biological Engineering, Korea University, 5-1 Anam-dong, Seongbuk-gu, Seoul 02841, Republic of Korea

<sup>c</sup>School of Chemical and Biological Engineering, Seoul National University, Gwanak-ro, Gwanak-gu, Seoul 08826, Republic of Korea

<sup>d</sup>Department of Chemistry and Chemical Engineering, Inha University, 100 Inha-ro, Michuhol-gu, Incheon 22212, Republic of Korea

<sup>e</sup>Department of Energy and Materials Engineering, Dongguk University-Seoul, Seoul 04620, Republic of Korea

<sup>f</sup>Energy Storage Research Center, Korea Institute of Science and Technology (KIST), 5 Hwarang-ro 14-gil, Seongbuk-gu, Seoul 02792, Republic of Korea

<sup>g</sup>Department of Energy Engineering, College of Engineering, Hanyang University, 222 Wangsimni-ro, Seongdong-gu, Seoul 04763, Republic of Korea

<sup>h</sup>Center for Nanoparticle Research, Institute for Basic Science (IBS), Gwanak-ro, Gwanak-gu, Seoul 08826, Republic of Korea

<sup>i</sup>Division of Energy & Environment Technology, KIST School, University of Science and Technology (UST), 217 Gajeong-ro, Yuseong-gu, Daejeon 34113, Republic of Korea

<sup>j</sup>KHU-KIST Department of Converging Science and Technology, Kyung Hee University, 26 Kyunghedae-ro, Dongdaemun-gu, Seoul 02447, Republic of Korea

\*Corresponding Author: Sung Jong Yoo; Tel: +82-2-958-5260; E-mail: ysj@kist.re.kr

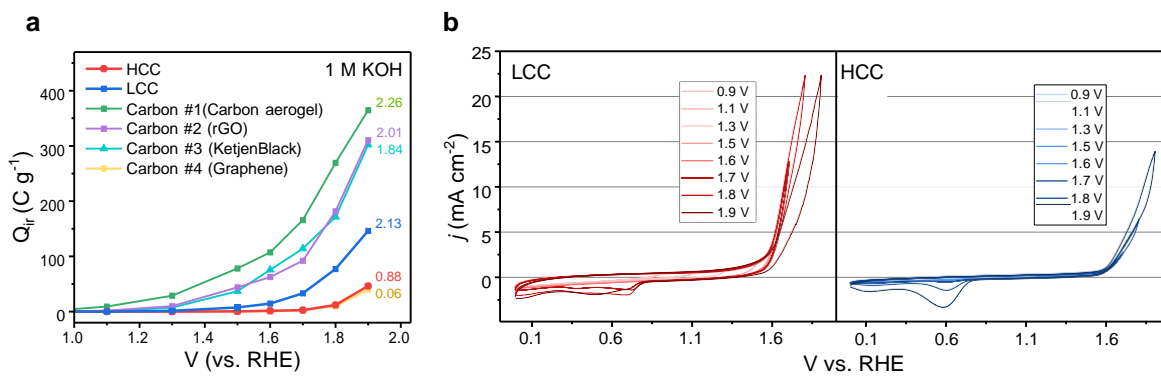

**Figure S1.** (a) Irreversible charge ( $Q_{ir}$ ) test results for various carbons in 1 M KOH. The numbers written next to each graph represent the  $I_D/I_G$  ratio values obtained from Raman spectroscopy. (b) CV spectra for LCC and HCC obtained by cycling from 0 to the specified voltage, respectively.

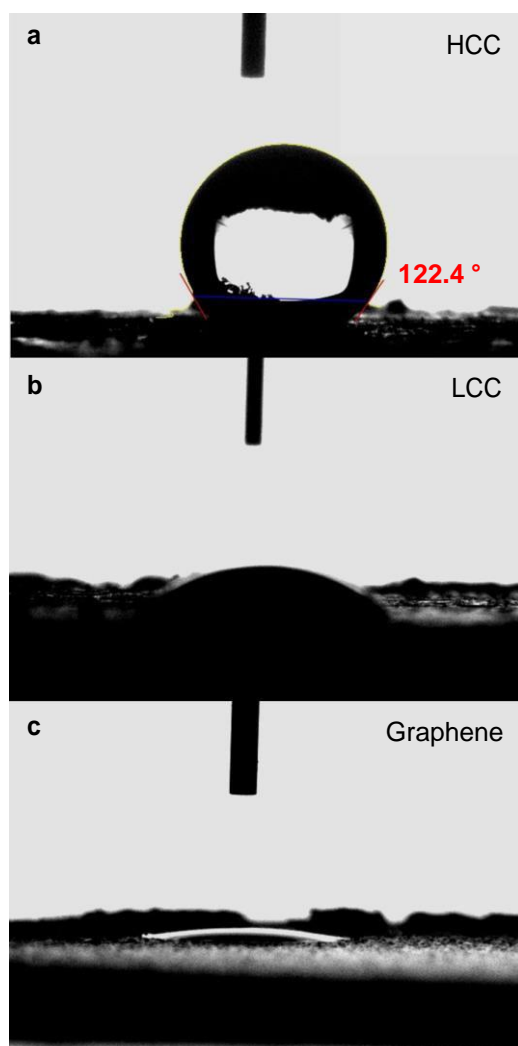

**Figure S2.** Contact angle measurements of water droplet on (a) HCC, (b) LCC, and (c) graphene, respectively.

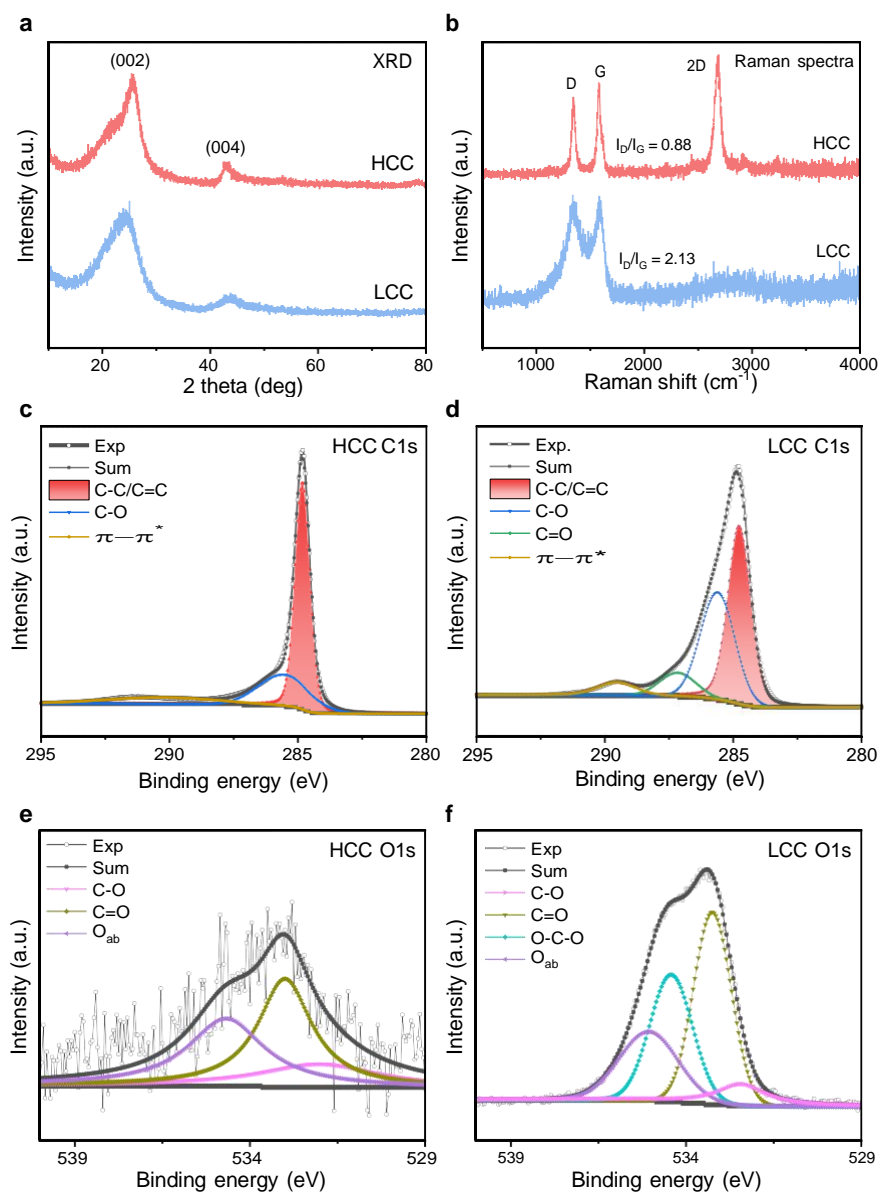

**Figure S3.** Structural and chemical analysis of HCC and LCC: (a) XRD patterns, (b) Raman spectra, and XPS spectra for (c, d) C 1s and (e, f) O 1s, respectively.

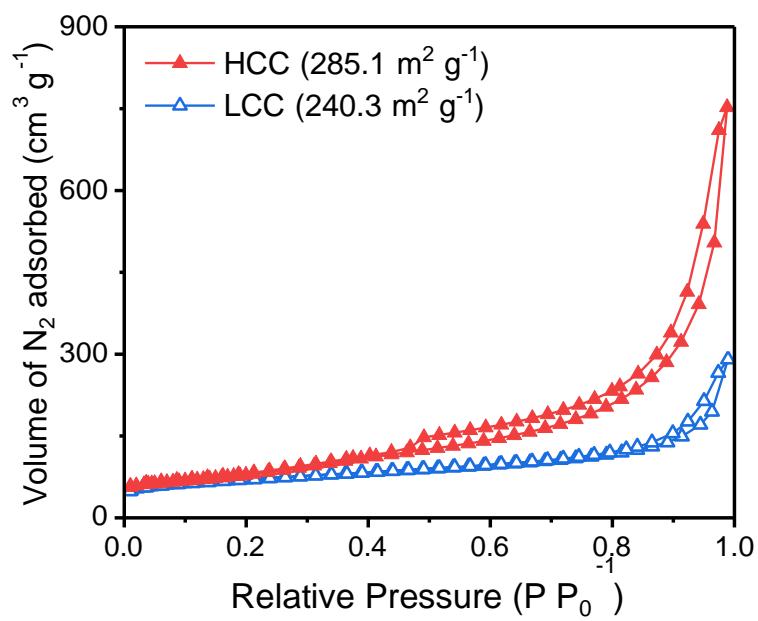

**Figure S4.** BET surface area plots for HCC and LCC, respectively.

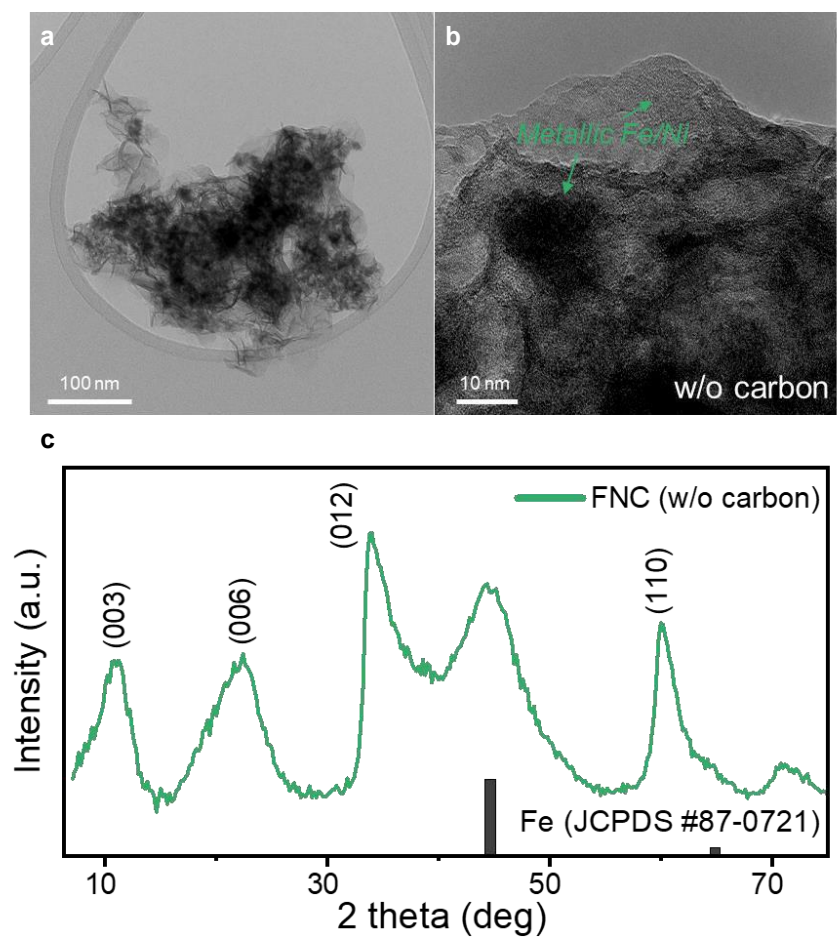

**Figure S5.** (a, b) TEM images and (c) XRD pattern of FNC obtained in the absence of carbon supports with reference pattern of Fe.

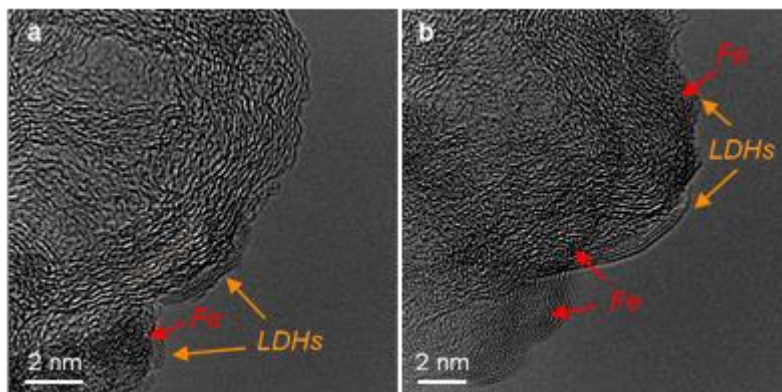

**Figure S6.** (a, b) TEM images of FNC/HCC obtained at reaction time of 3 min.

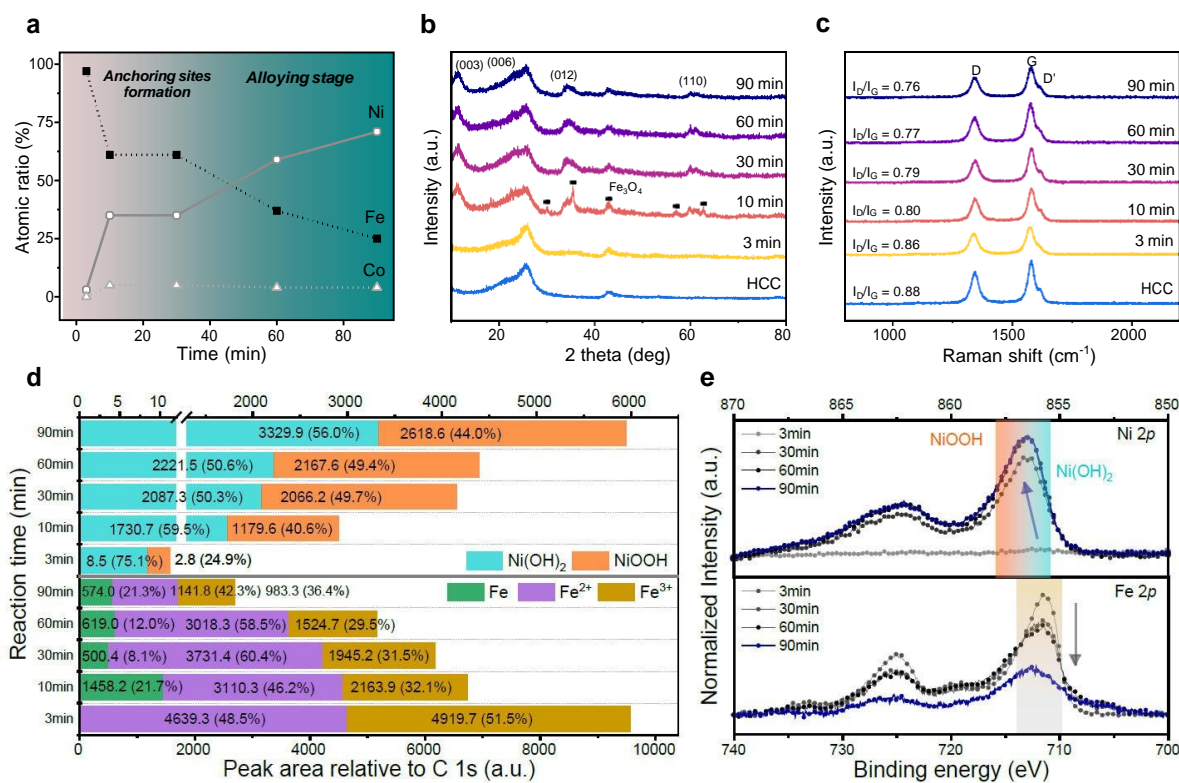

**Figure S7.** Time-dependent *ex-situ* characterization of FNC/HCC; (a) EDS atomic ratio of Fe, Ni, and Co. (b) XRD patterns. (c) Raman spectra. (d) Changes in oxidation states of Fe and Ni and (e) corresponding XPS spectra for Ni 2*p* and Fe 2*p* during FNC/HCC synthesis.



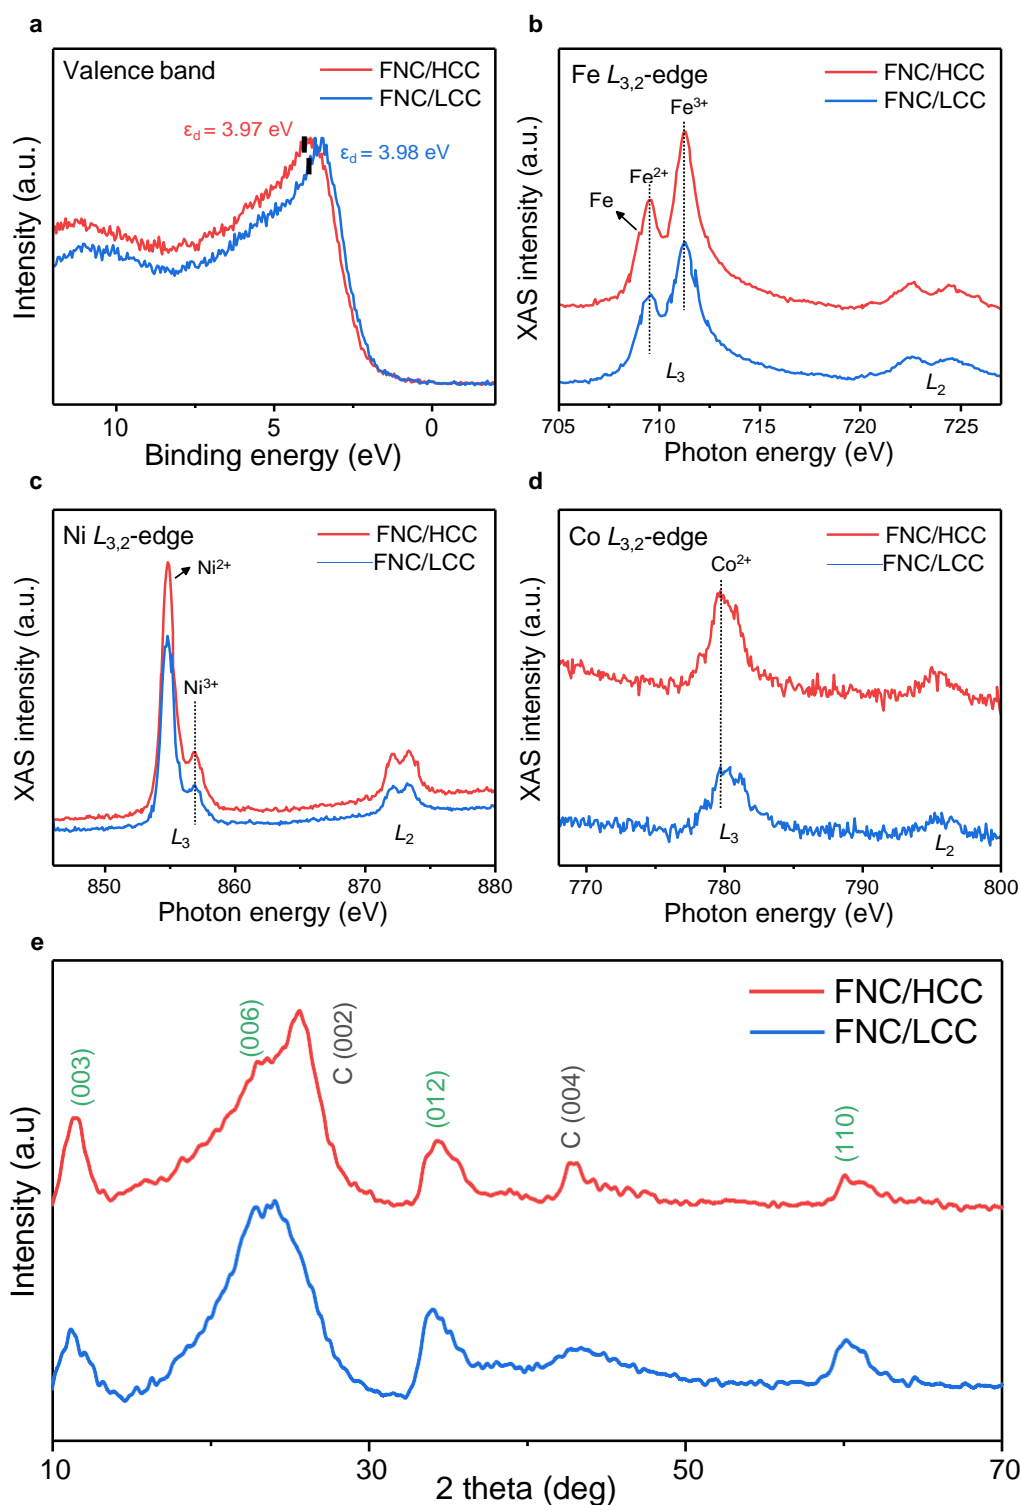

**Figure S8.** XPS spectra for (a) valence band region. Near edge X-ray absorption fine structure spectra for (b) Fe  $L_{3,2}$ -edge, (c) Ni  $L_{3,2}$ -edge, and (d) Co  $L_{3,2}$ -edge of FNC/HCC and FNC/LCC. (e) XRD patterns for FNC/HCC and FNC/LCC.

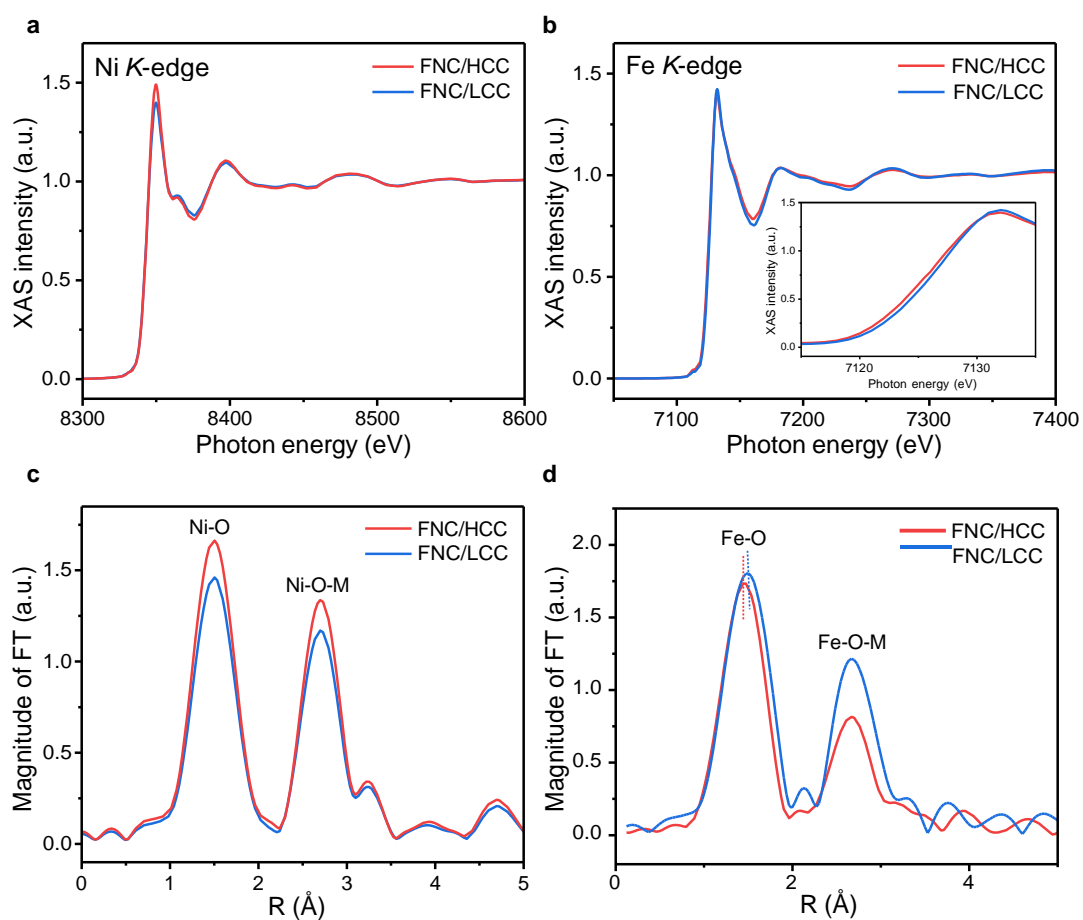

**Figure S9.** X-ray absorption spectroscopy results of FNC/HCC and FNC/LCC. (a) Ni *K*-edge and (b) Fe *K*-edge X-ray absorption near edge structure spectra and corresponding the FT of extended X-ray absorption fine structure spectra of (c) Ni *K*-edge and (d) Fe *K*-edge.

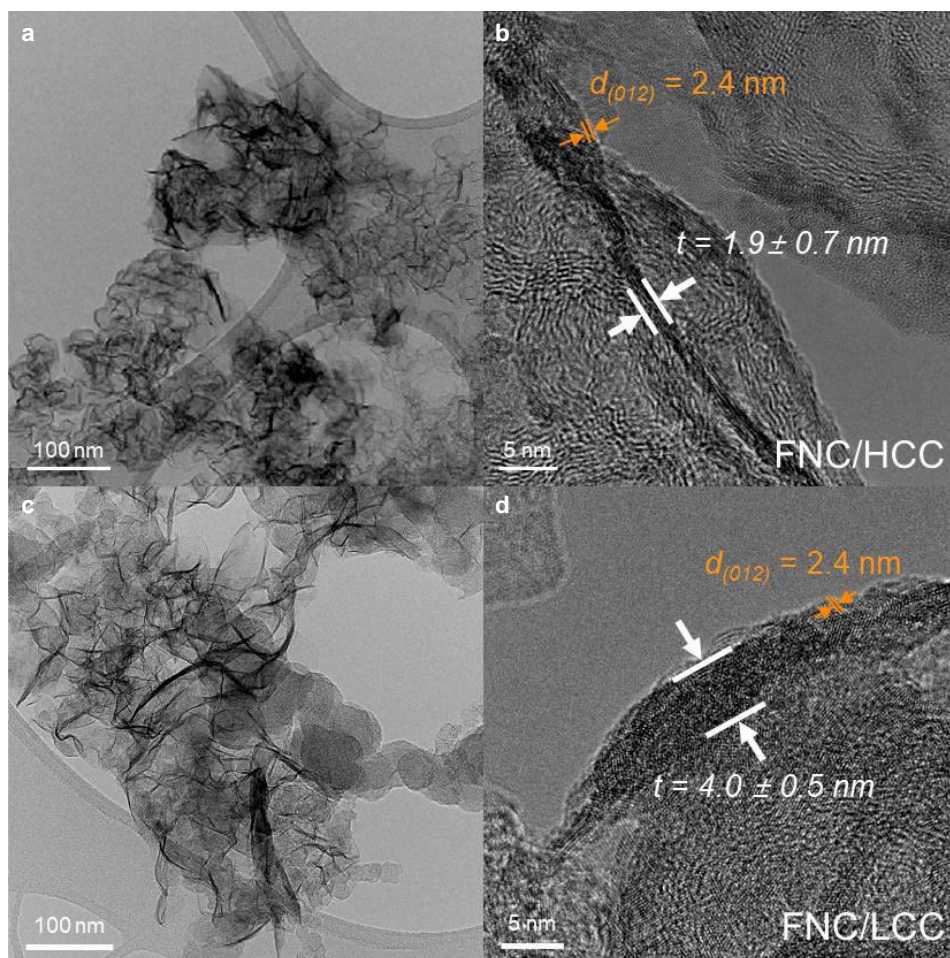

**Figure S10.** TEM, high resolution TEM images of (a, b) FNC/HCC and (c, d) FNC/LCC, respectively.

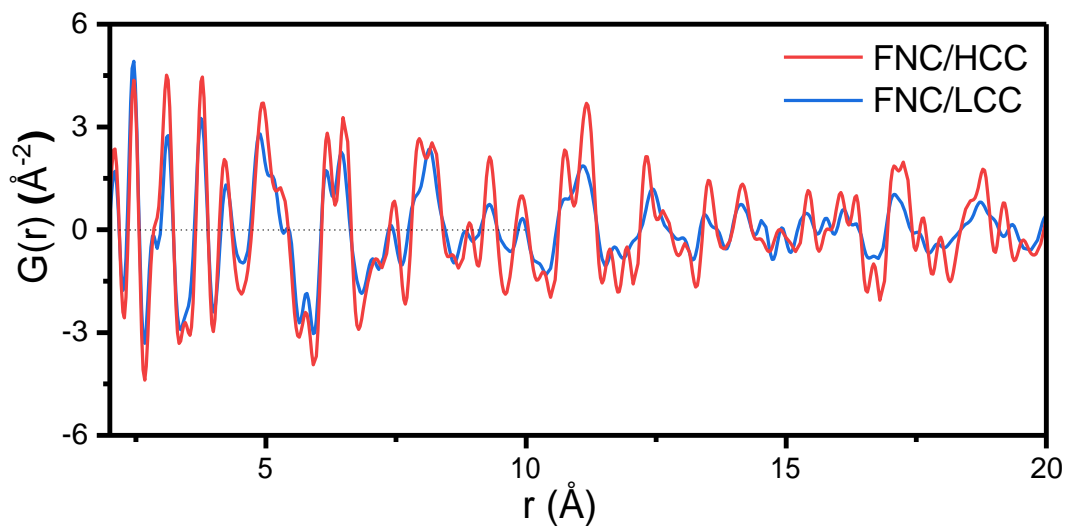

**Figure S11.** X-ray pair distribution functions for FNC/HCC and FNC/LCC.

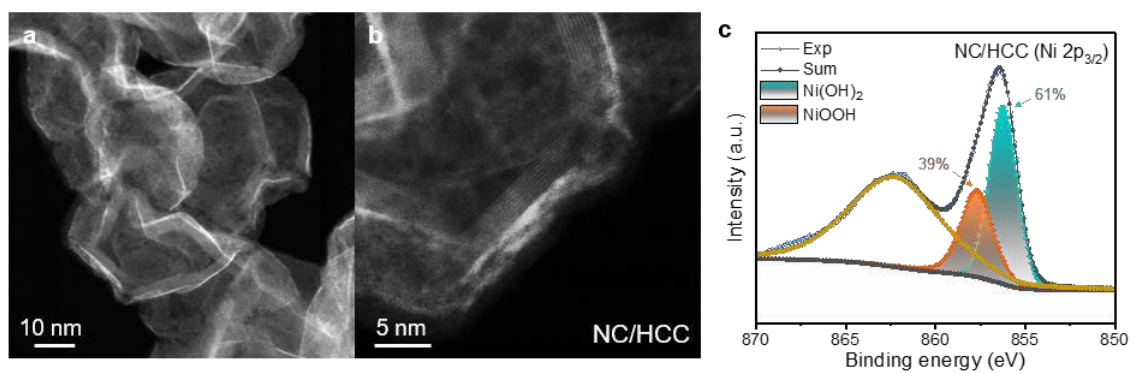

**Figure S12** (a, b) STEM images and (c) XPS Ni 2p spectrum for NC/HCC obtained without Fe.

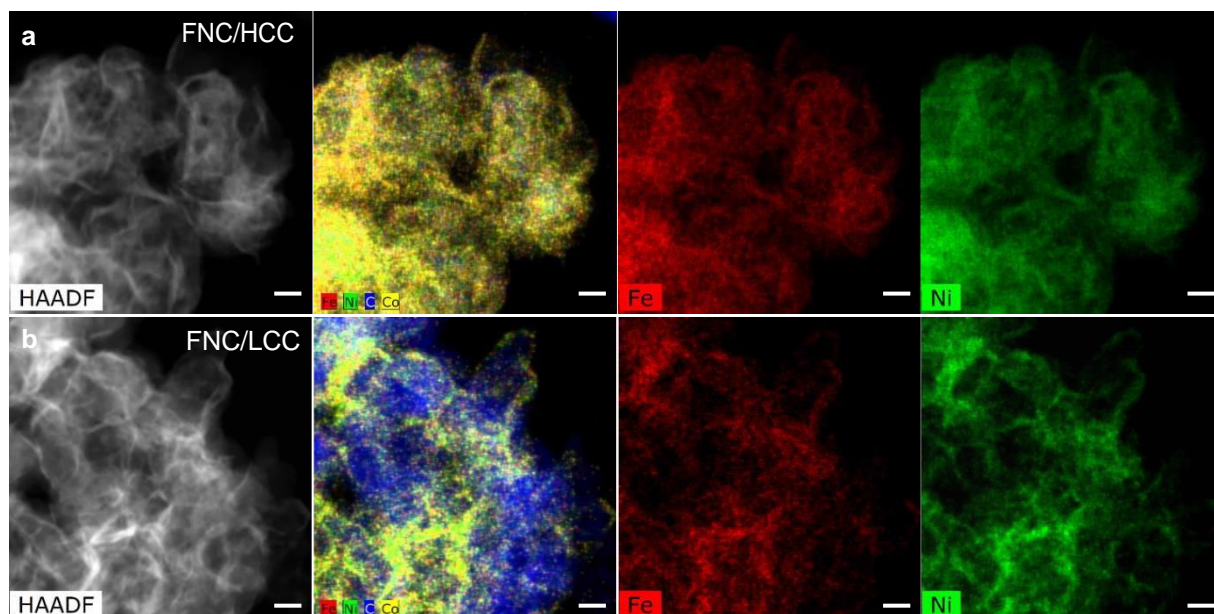

**Figure S13.** EDS elemental mapping images of (a) FNC/HCC and (b) FNC/LCC obtained after 1000 h and 100 h of reaction, respectively. High angle annular dark field-STEM and overlay image of Fe (red), and Ni (green), Co (yellow), and C (blue).

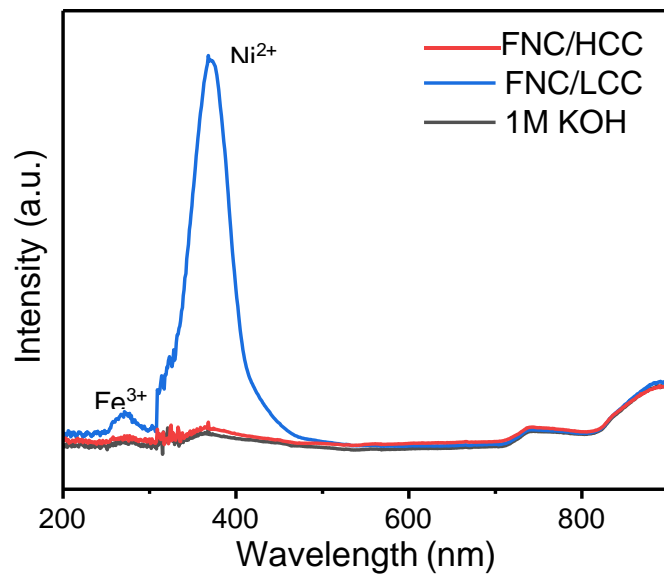

**Figure S14.** UV-vis absorption spectra of electrolyte collected after stability test. The test were conducted for 100 h and 1000 h with FNC/LCC and FNC/HCC, respectively.

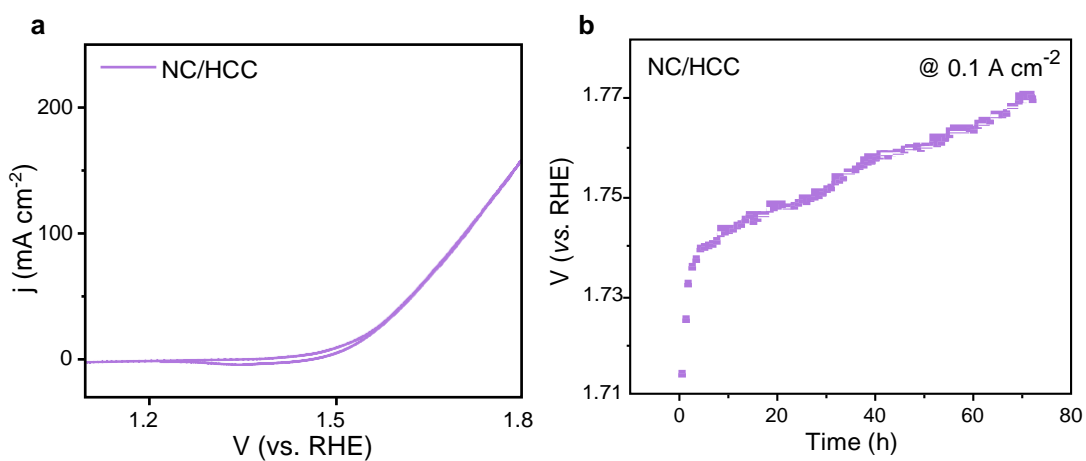

**Figure S15.** (a) Linear sweep voltammetry curve obtained with NC/HCC. (b) Stability test result under galvanostatic conditions of 0.1 A cm<sup>-2</sup> at 25°C.



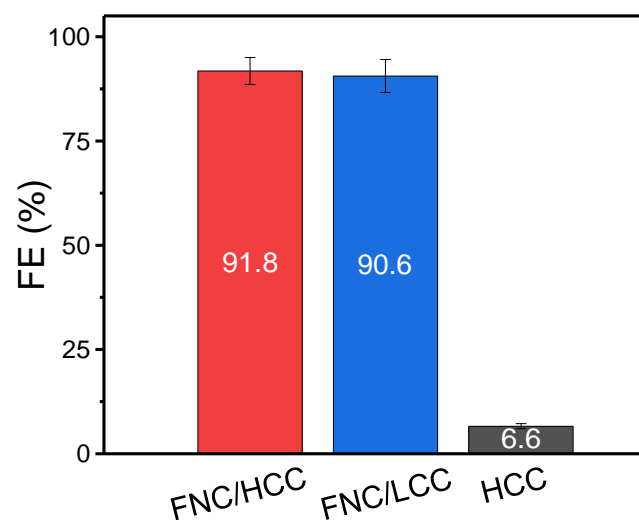

**Figure S16.** Faradaic efficiency of oxygen evolution for FNC/HCC, FNC/LCC, and HCC.

The error bars represent the standard deviations of three independent measurements.

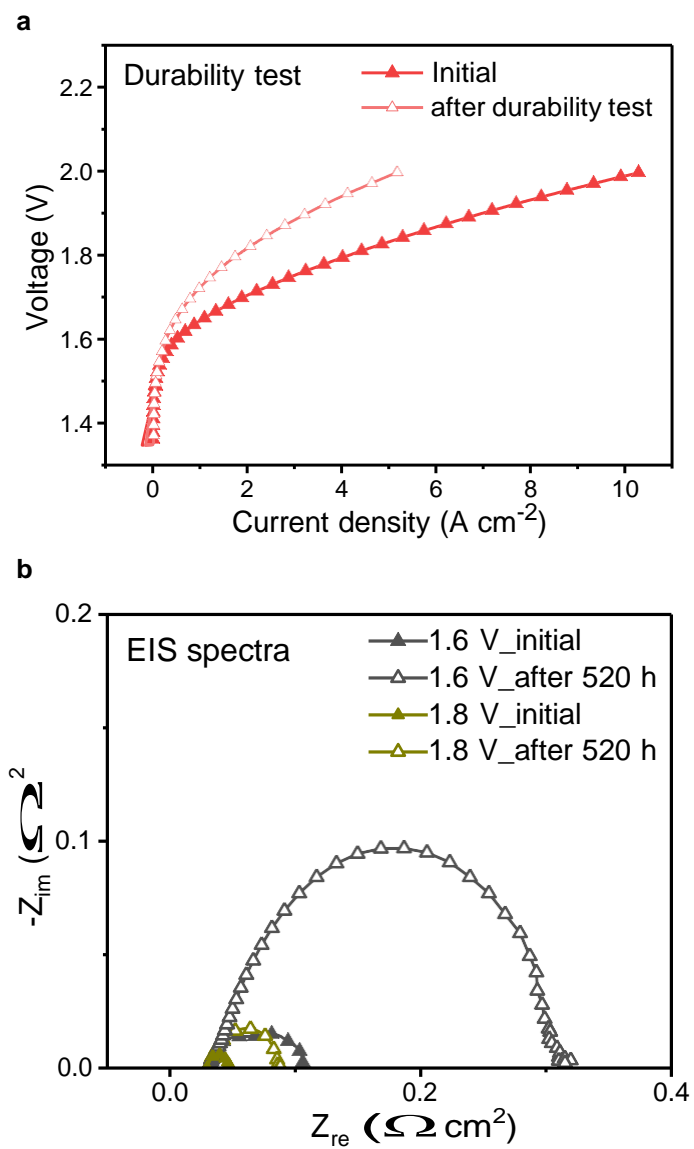

**Figure S17.** (a) AEMWE performance and (b) EIS spectra for FNC/HCC measured before and after 520 hours of durability test.

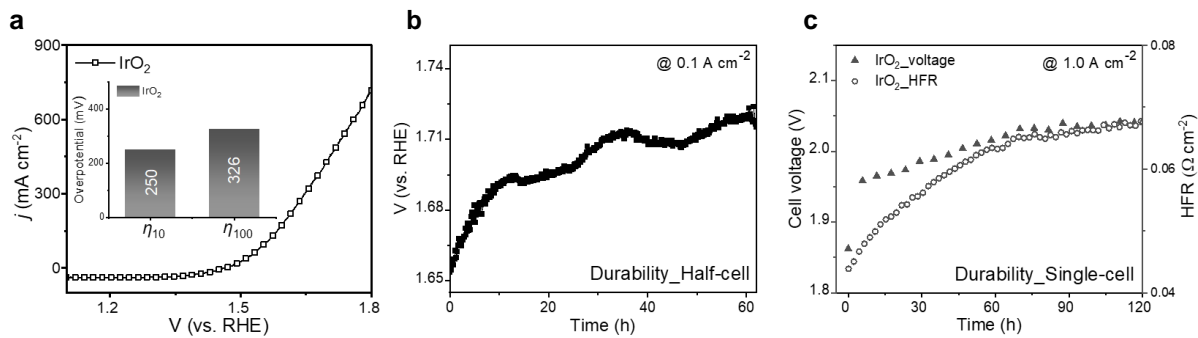

**Figure S18.** (a) LSV curve for IrO<sub>2</sub> with the inset showing the overpotential for current densities of 10 and 100 mA cm<sup>-2</sup>. (b) Long-term stability test under galvanostatic conditions of 0.1 A cm<sup>-2</sup> at 25 °C. (c) AEMWE durability at 1.0 A cm<sup>-2</sup>.

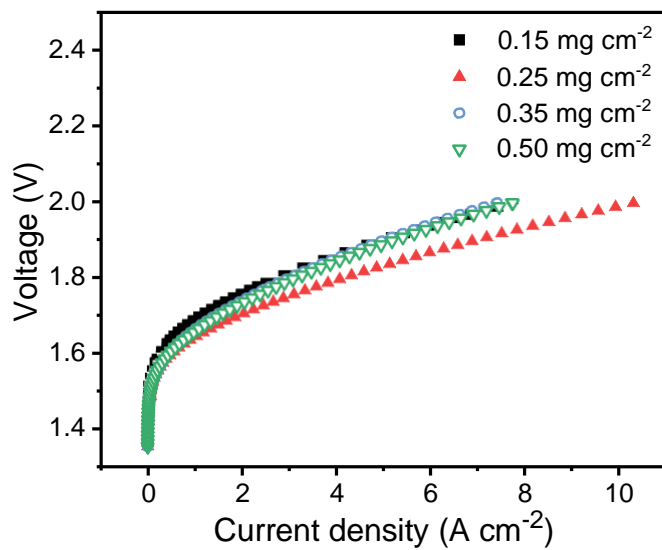

**Figure S19.** Current–voltage (I–V) curves obtained from different loading mass of FNC electrocatalyst. During MEA fabrication, if the loading amount exceeded 0.50 mg cm<sup>-2</sup>, the catalysts became detached from the membrane.

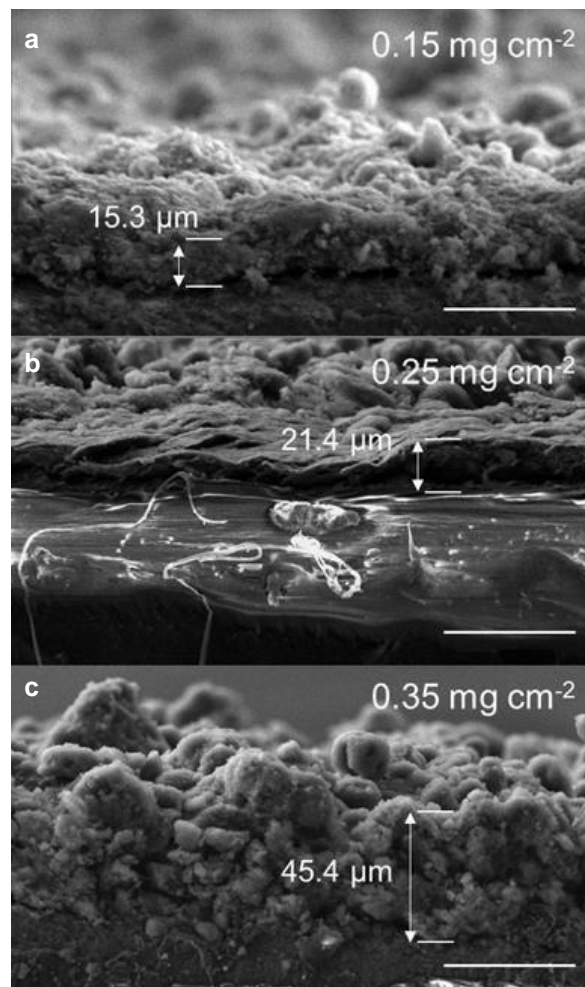

**Figure S20.** Cross-sectional SEM images of the catalyst layer with different loading mass: (a)  $0.15$ , (b)  $0.25$ , and (c)  $0.35 \text{ mg cm}^{-2}$ . All scale bars are  $50 \text{ }\mu\text{m}$ .

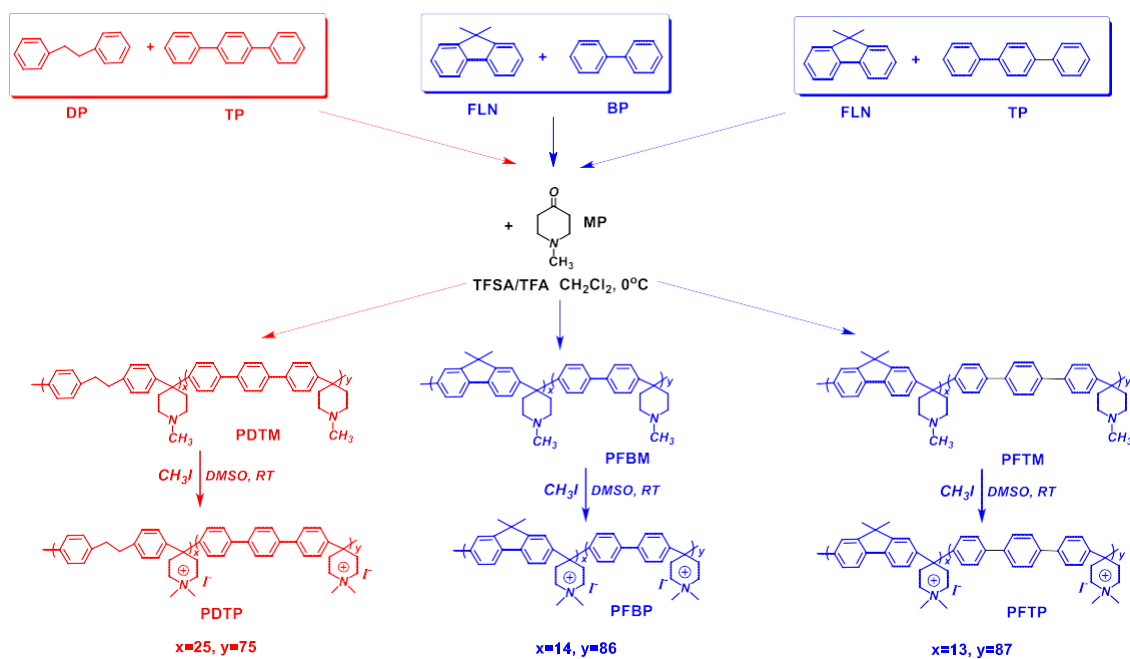

**Figure S21.** Chemical structure and synthesis routes of PDTP, PFBP, and PFTP.

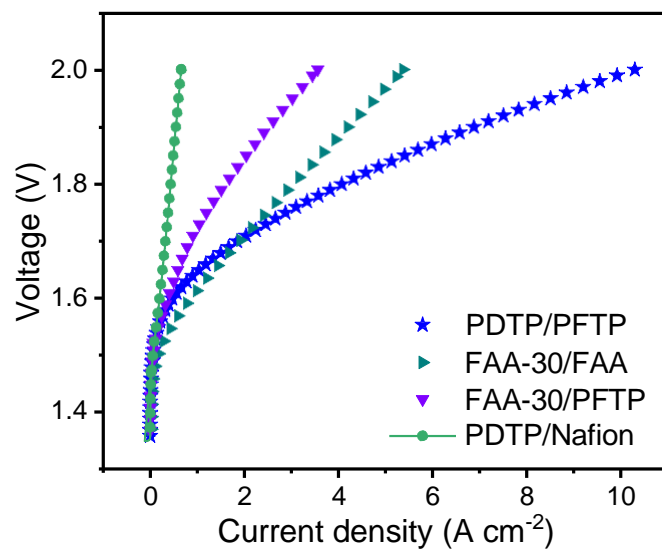

**Figure S22.** I–V curves obtained using various membrane/anode-ionomer combinations.

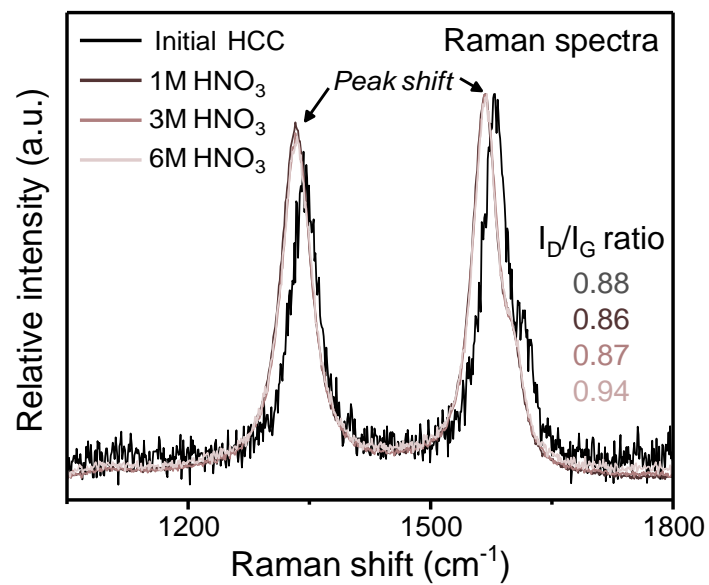

**Figure S23.** Raman spectra for HCC and acid-treated HCC. I<sub>D</sub>/I<sub>G</sub> ratio values were obtained from Raman analysis.



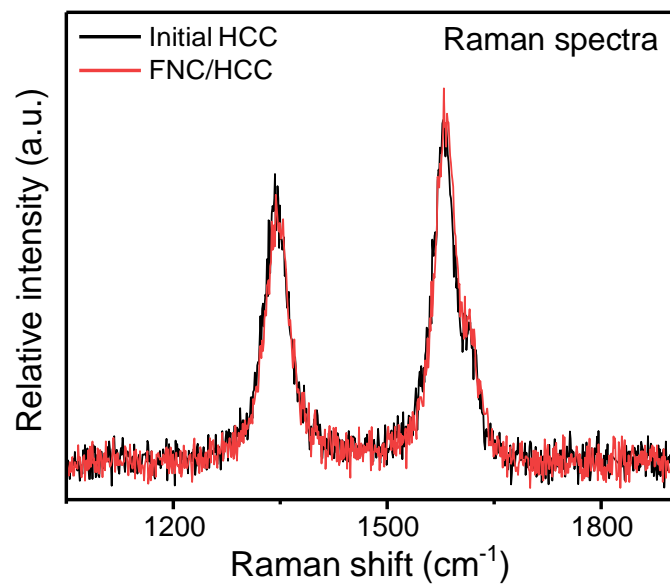

**Figure S24.** Raman spectra for as-prepared HCC (black) and FNC/HCC (red).

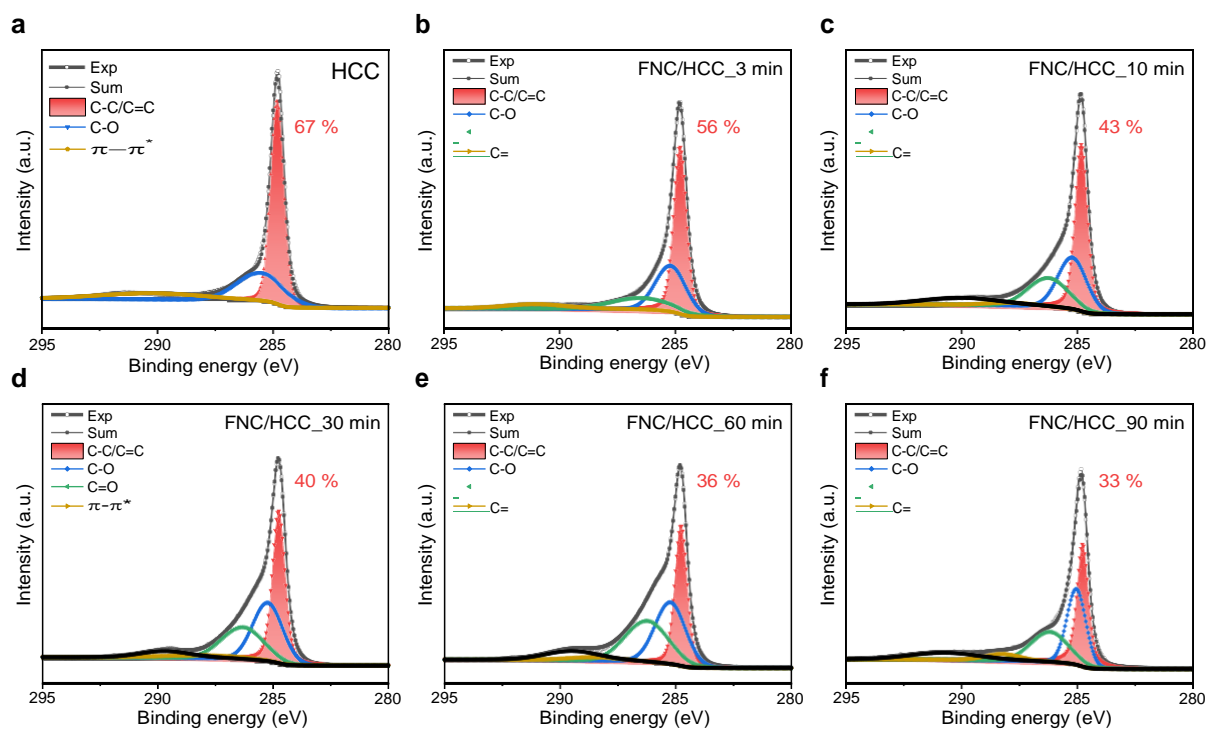

**Figure S25.** XPS C 1s spectra obtained at different stages of FNC/HCC formation: (a) before and after (b) 3 min, (c) 10 min, (d) 30 min, (e) 60 min, and (f) 90 min of the reaction.

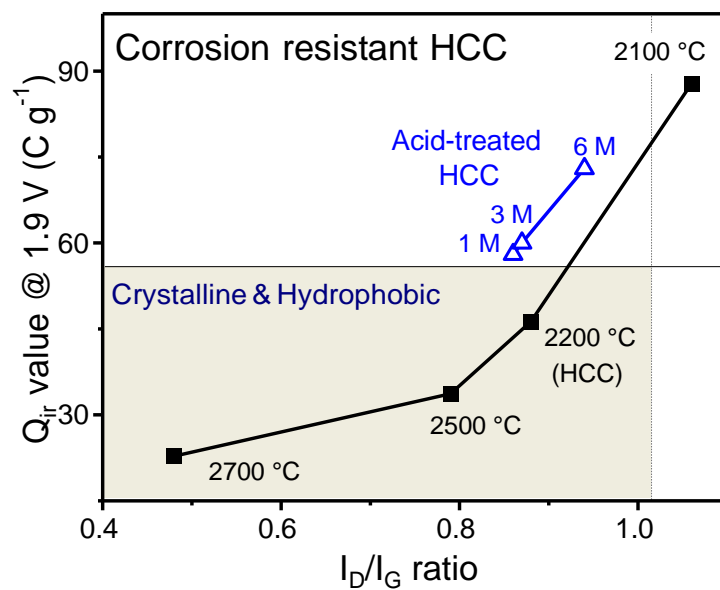

**Figure S26.** Correlation between  $I_D/I_G$  ratio and corrosion resistivity of carbon annealed at different temperatures (2100, 2200, 2500, and 2700 °C) or treated with different concentration (1 M, 3 M, and 6 M) of  $HNO_3$ .

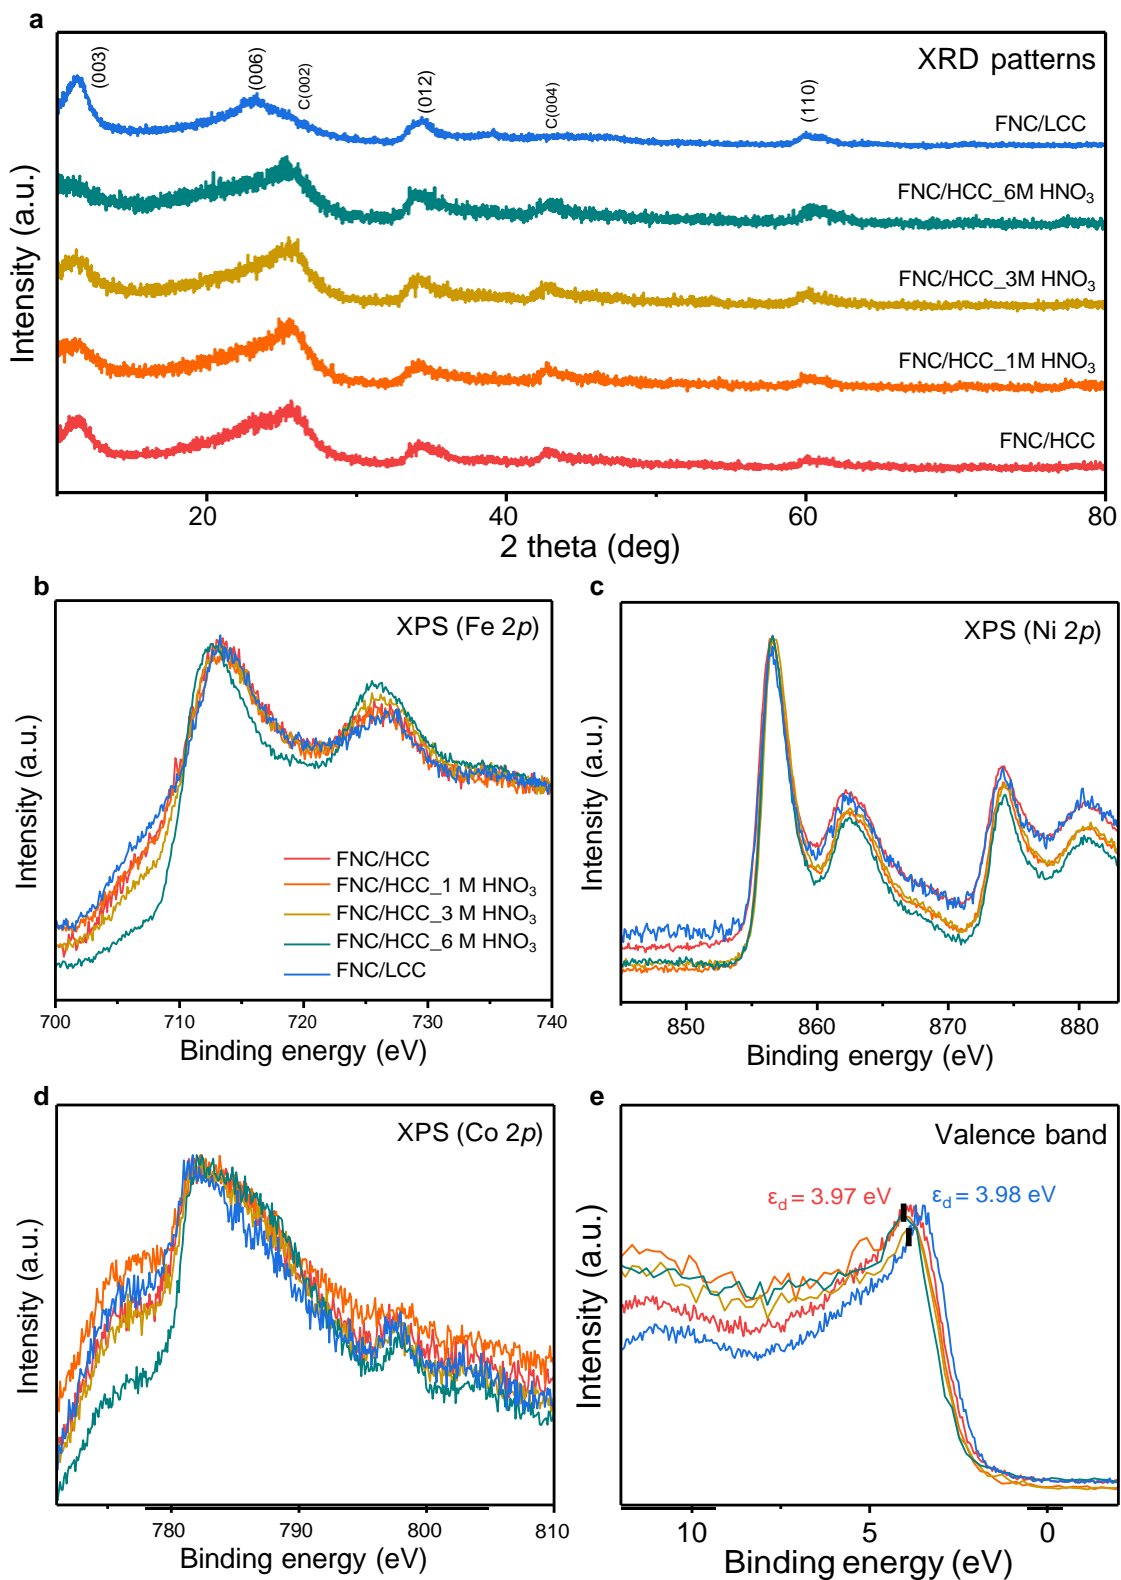

**Figure S27.** (a) XRD and XPS spectra for (b) Fe 2p, (c) Ni 2p, (d) Co 2p, and (e) valence band of FNC electrocatalyst supported on HCC, acid-treated HCC, and LCC.

| <b>ICP-MS</b> | <b>Fe (wt.%)</b> | <b>Ni (wt.%)</b> | <b>Co (wt.%)</b> | <b>Total (wt.%)</b> |
|---------------|------------------|------------------|------------------|---------------------|
| FNC/HCC       | 4.87             | 14.09            | 0.40             | 19.36               |
| FNC/LCC       | 2.60             | 10.26            | 0.40             | 13.26               |

**Table S1.** Comparison of catalyst composition of FNC/HCC and FNC/LCC, determined by ICP-MS.

|                                | <b>FNC/HCC</b> | <b>FNC/LCC</b> | <b>Unsupported FNC</b> |
|--------------------------------|----------------|----------------|------------------------|
| 2 theta (degree)               | 11.48          | 11.36          | 10.77                  |
|                                | 23.59          | 22.63          | 21.96                  |
| Crystallite size (nm)          | 6.81           | 4.97           | 2.60                   |
|                                | 1.32           | 1.55           | 1.63                   |
| Interlayer distance (Å)        | 7.70           | 7.78           | 8.21                   |
|                                | 3.77           | 3.93           | 4.05                   |
| Lattice parameter c (Å)        | 23.11          | 23.34          | 24.63                  |
|                                | 22.61          | 23.55          | 24.27                  |
| (006)/(003) plane height ratio | 1.05           | 2.67           | 1.70                   |

**Table S2.** Two theta value, crystallite size, interlayer distance, lattice parameter c, and ratio of (006) to (003) obtained from XRD data.

| ICP-MS      | Fe (at.%) | Ni (at.%) | Co (at.%) |
|-------------|-----------|-----------|-----------|
| FNC/HCC     | 25        | 71        | 4         |
| After 1000h | 18        | 79        | 3         |
| FNC/LCC     | 20        | 77        | 3         |
| After 100h  | 22        | 76        | 2         |

**Table S3.** Components of the electrocatalysts before and after the stability test determined by the ICP-MS.

| Electrocatalyst                  | $j @ 1.8 \text{ V}$<br>( $\text{A cm}^{-2}$ ) | Specific power @1.8 V<br>( $\text{kW g}_{\text{metal}}^{-1}$ ) | Reference                                                          |
|----------------------------------|-----------------------------------------------|----------------------------------------------------------------|--------------------------------------------------------------------|
| <b>FNC/HCC</b>                   | <b>4.07</b>                                   | <b>24.11</b>                                                   | <b><u>This work</u></b>                                            |
| <b>FNC/LCC</b>                   | <b>2.80</b>                                   | <b>16.58</b>                                                   |                                                                    |
| IrO <sub>x</sub>                 | 3.57                                          | 21.14                                                          |                                                                    |
|                                  | 3.5                                           | 2.59                                                           | <i>Energy Environ. Sci.</i> , <b>2021</b> , 14, 6338-6348.         |
| Carbon-supported                 | 1.5                                           | 0.74                                                           | <i>ACS Appl. Mater. Interfaces</i> , <b>2021</b> , 13, 37179-37186 |
|                                  | 1.0                                           | 2.96                                                           | <i>Electrochim. Acta</i> <b>2020</b> , 353, 136521.                |
|                                  | 0.8                                           | 0.03                                                           | <i>Electrochim. Acta</i> <b>2022</b> , 413, 140078.                |
|                                  | 0.03                                          | 0.49                                                           | <i>J. Mater. Chem. A</i> , <b>2021</b> , 9, 14043-14051.           |
|                                  | 1.0                                           | 8.23                                                           | <i>J. Power Sources</i> <b>2019</b> , 415, 136-144.                |
|                                  | 1.6                                           | 1.18                                                           | <i>J. Ind. Eng. Chem.</i> <b>2022</b> , 109, 453–460.              |
| Directed-coated electrocatalysts | 2.5                                           | 4.50                                                           | <i>ACS Catal.</i> <b>2022</b> , 12, 135–145.                       |
|                                  | 1.5                                           | 0.74                                                           | <i>ACS Appl. Mater. Interfaces</i> , <b>2021</b> , 13, 37179-37186 |
|                                  | 0.6                                           | 0.05                                                           | <i>Energy Environ. Sci.</i> , <b>2021</b> , 14, 6338.              |
| Oxide-based                      | 1.5                                           | 0.54                                                           | <i>Adv. Mater. Interfaces</i> , <b>2022</b> , 9, 2102063           |
|                                  | 1.3                                           | 0.19                                                           | <i>J. Mater. Chem. A</i> , <b>2020</b> , 8, 4290-4299.             |
|                                  | 1.0                                           | 0.06                                                           | <i>ACS Sustainable Chem. Eng.</i> , <b>2020</b> , 8, 2344-2349.    |
|                                  | 0.63                                          | 0.93                                                           | <i>Nat. Energy</i> , <b>2019</b> , 2, 763-772.                     |
|                                  | 0.55                                          | 0.23                                                           | <i>J. Power Sources</i> <b>2021</b> , 514, 230563.                 |
|                                  | 0.15                                          | 0.07                                                           | <i>Adv. Funct. Mater.</i> , <b>2018</b> , 28, 1804355.             |
|                                  | 0.10                                          | 0.01                                                           | <i>Int. J. Hydrog. Energy</i> , <b>2018</b> , 43, 21999-22011      |
|                                  | 0.025                                         | 0.09                                                           | <i>J. Power Source</i> , <b>2021</b> , 485, 229217                 |

**Table S4.** AEMWE performance comparison of the state-of-the-arts electrocatalysts.
